# Supplementary material for: Effect of Anti-Rheumatic Treatment on the Periodontal Condition of Rheumatoid Arthritis Patients
Source: PubMed Central journal article supplement (PMC7967392; doi:10.3390/ijerph18052529), 2021-03-04
Supplement: ijerph-18-02529-s001.pdf [file ijerph-18-02529-s001.pdf]

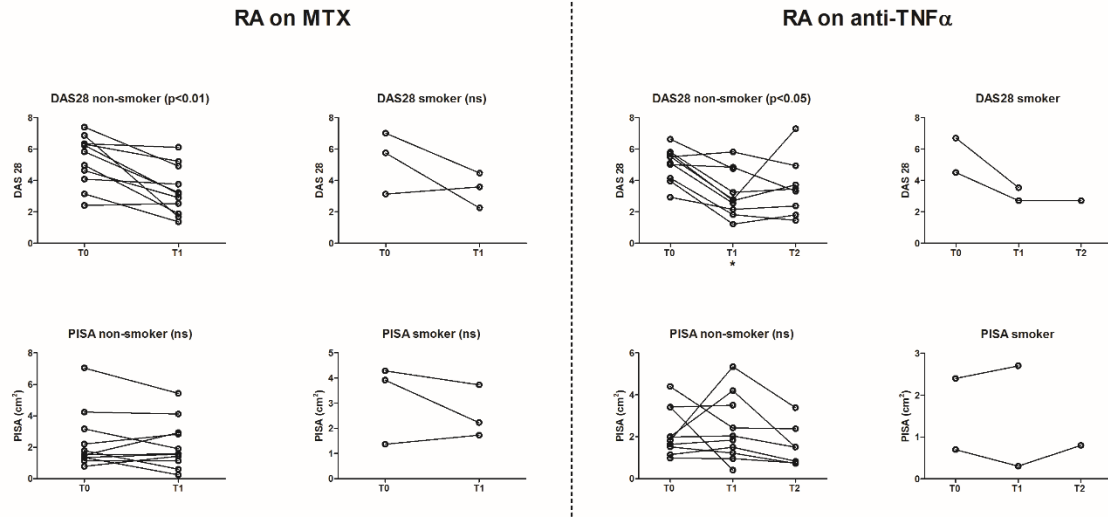

**Supplementary Figure S1.** Effects of anti-rheumatic treatment (methotrexate (MTX) and anti-tumor necrosis factor- $\alpha$  (anti-TNF in addition to MTX) on disease activity (DAS28) and the periodontal inflamed surface area (PISA).
